# Supplementary material for: Novel Biosynthesis of Graphene-Supported Zero-Valent Iron Nanohybrid for Efficient Decolorization of Acid and Basic Dyes
Source: MDPI journal article supplement (doi:10.3390/su142114188), 2022-10-31
Supplement: s1 [file s1]

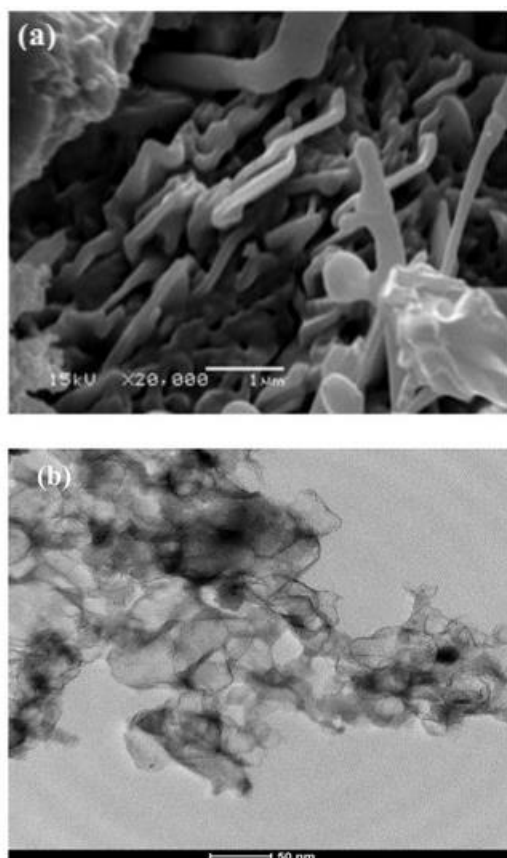

**Figure S1.** SEM and TEM of graphene [1].

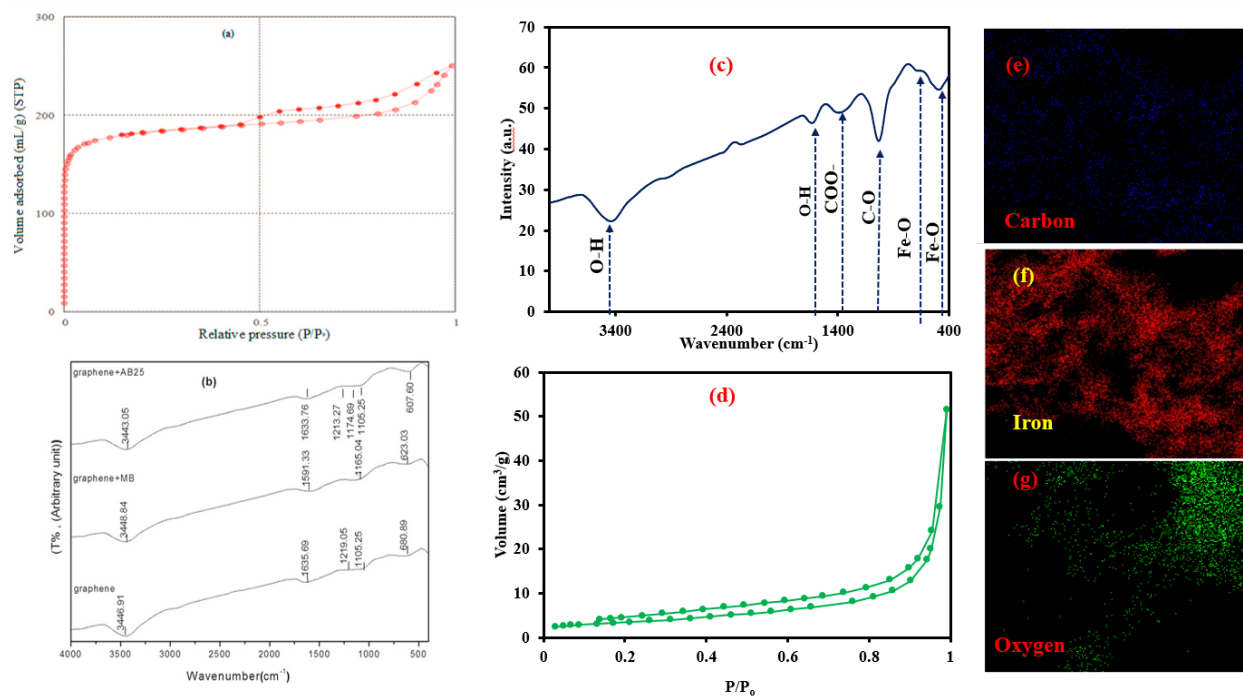

**Figure S2.** (a,b) adsorption-desorption isotherms and FTIR spectra of graphene, (c,d) FTIR spectra and adsorption-desorption isotherms of ZVI-graphene and (e-g) elemental mapping of graphene and ZVI-graphene [1].

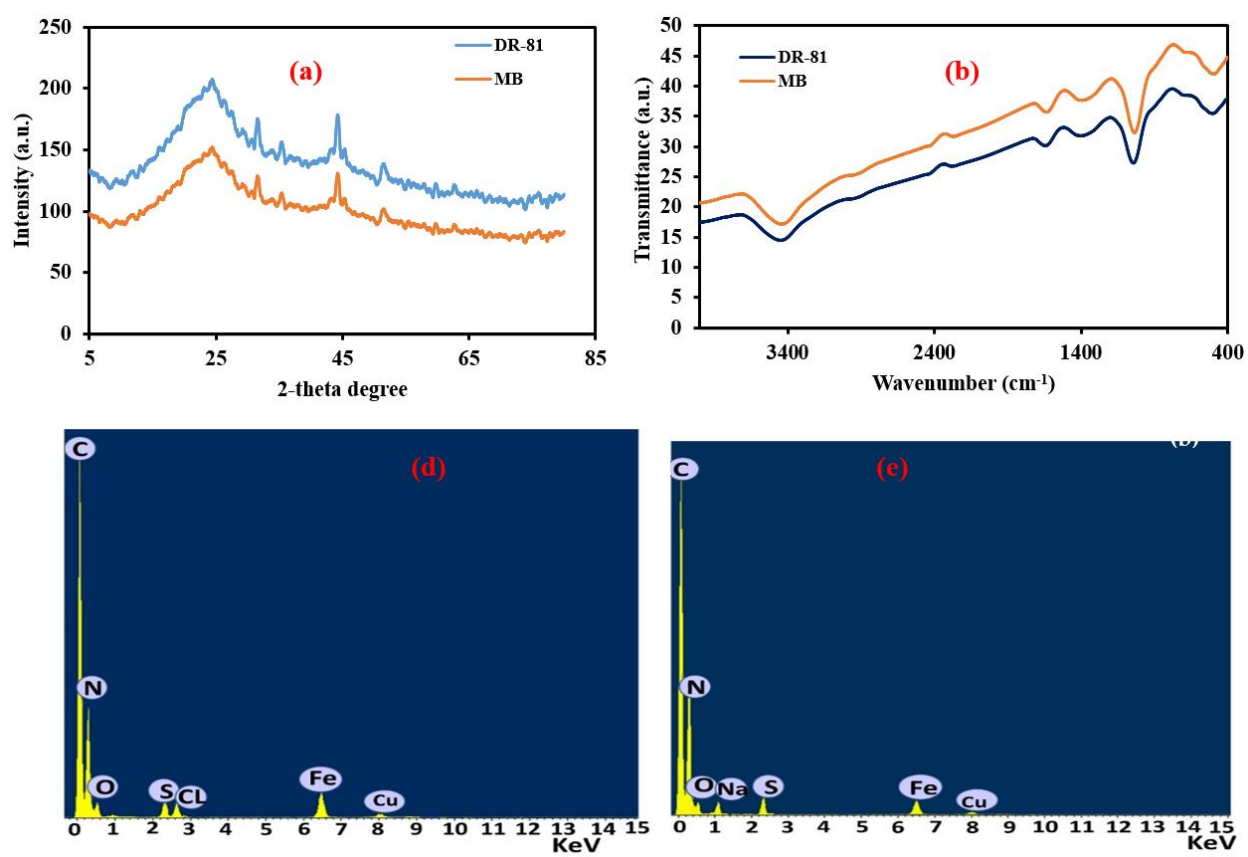

**Figure S3.** (a) XRD pattern, (b) FTIR spectra and EDXof ZVI/graphene after adsorption of (d) MB and (e) DR-81.

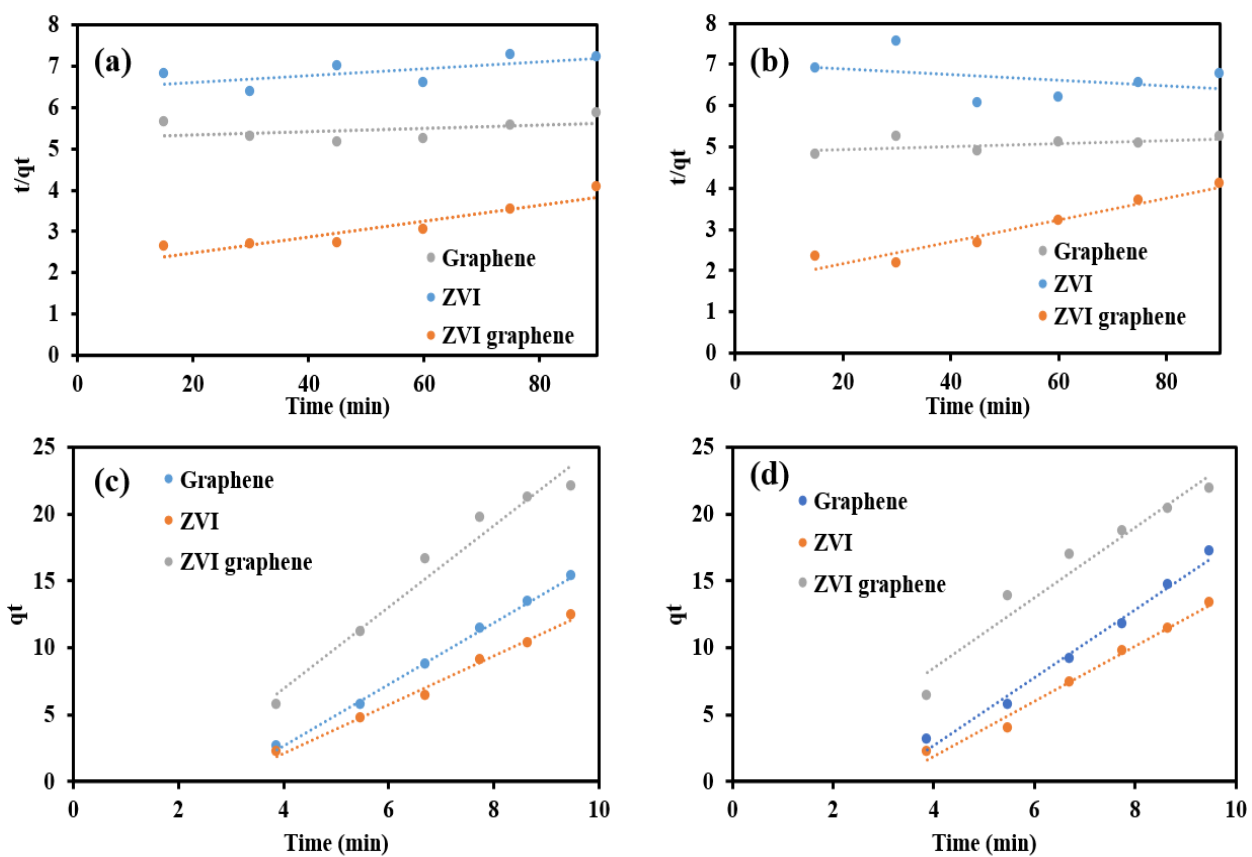

**Figure S4.** Adsorption kinetics (a) second-order model of DR-81, (b) second-order model of MB, (c) intraparticle diffusion model of DR-81 and (d) intraparticle diffusion model of MB for adsorption on ZVI, graphene, and ZVI-graphene.

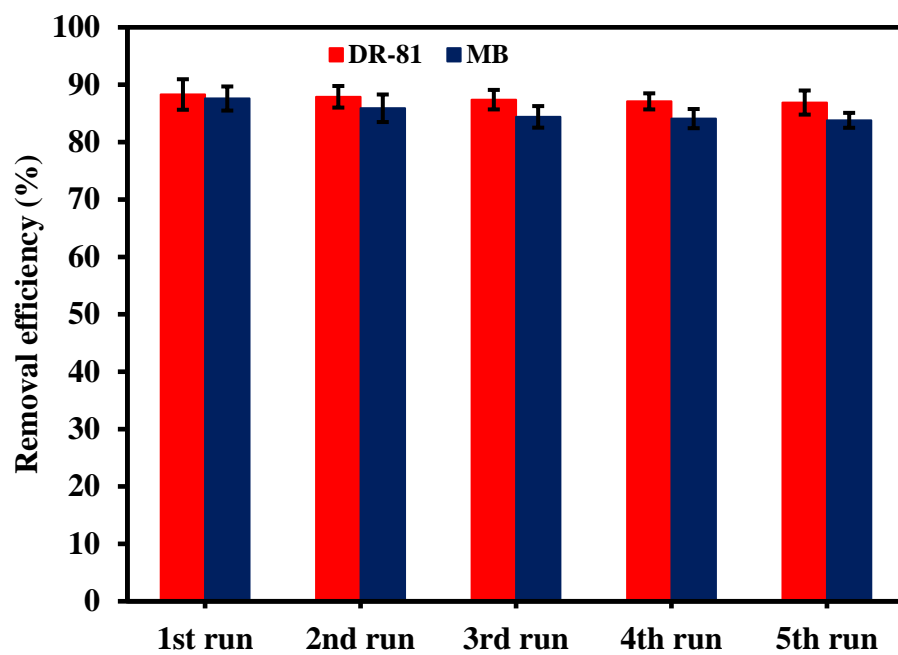

Figure S5. Stability of the prepared composite.

**Table S1.**Constant rates and coefficients of determination of first-order, second-order and intraparticle diffusion kinetic models.

| Kinetic Model                 | DR-81                                                                           | MB                                                                              |
|-------------------------------|---------------------------------------------------------------------------------|---------------------------------------------------------------------------------|
| First-order model             | $R^2 = 0.947$                                                                   | $R^2 = 0.929$                                                                   |
| Graphene                      | $K_1 = 0.0273 \text{ min}^{-1}$<br>$q_e = 18.76 \text{ mg/g}$                   | $K_1 = 0.026 \text{ min}^{-1}$<br>$q_e = 20.6 \text{ mg/g}$                     |
| ZVI                           | $R^2 = 0.96$<br>$K_1 = 0.0236 \text{ min}^{-1}$<br>$q_e = 14.33 \text{ mg/g}$   | $R^2 = 0.94$<br>$K_1 = 0.0245 \text{ min}^{-1}$<br>$q_e = 16.36 \text{ mg/g}$   |
| ZVI/graphene                  | $R^2 = 0.95$<br>$K_1 = 0.0434 \text{ min}^{-1}$<br>$q_e = 30.17 \text{ mg/g}$   | $R^2 = 0.99$<br>$K_1 = 0.0352 \text{ min}^{-1}$<br>$q_e = 23.8 \text{ mg/g}$    |
| Second-order model            | $R^2 = 0.1466$                                                                  | $R^2 = 0.338$                                                                   |
| Graphene                      | $K_2 = 0.0000072 \text{ g/mg/min}$<br>$q_e = 263.2 \text{ mg/g}$                | $K_2 = 0.0000028 \text{ g/mg/min}$<br>$q_e = 270.27 \text{ mg/g}$               |
| ZVI                           | $R^2 = .42$<br>$K_2 = 0.0000107 \text{ g/mg/min}$<br>$q_e = 120.5 \text{ mg/g}$ | $R^2 = 0.126$<br>$K_2 = 0.0000065 \text{ g/mg/min}$<br>$q_e = 147 \text{ mg/g}$ |
| ZVI/graphene                  | $R^2 = 0.86$<br>$K_2 = 0.00017 \text{ g/mg/min}$<br>$q_e = 52.08 \text{ mg/g}$  | $R^2 = 0.93$<br>$K_2 = 0.00043 \text{ g/mg/min}$<br>$q_e = 37.6 \text{ mg/g}$   |
| Intraparticle diffusion model | $R^2 = 0.9975$                                                                  | $R^2 = 0.98$                                                                    |
| Graphene                      | $k_d = 2.3 \text{ mg/g/min}^{0.5}$<br>$c = 6.6 \text{ mg/g}$                    | $k_d = 2.55 \text{ mg/g/min}^{0.5}$<br>$c = 7.55 \text{ mg/g}$                  |
| ZVI                           | $R^2 = 0.99$<br>$k_d = 1.8 \text{ mg/g/min}^{0.5}$<br>$c = 5.14 \text{ mg/g}$   | $R^2 = 0.98$<br>$k_d = 2.06 \text{ mg/g/min}^{0.5}$<br>$c = 6.4 \text{ mg/g}$   |
| ZVI/graphene                  | $R^2 = 0.96$<br>$k_d = 3.04 \text{ mg/g/min}^{0.5}$<br>$c = 5.2 \text{ mg/g}$   | $R^2 = 0.94$<br>$k_d = 2.6 \text{ mg/g/min}^{0.5}$<br>$c = 2 \text{ mg/g}$      |

$K_1$ : Pseudo-first-order rate constant ( $\text{min}^{-1}$ ),  $k_2$ : Pseudo-second-order rate constant ( $\text{g/mg/min}$ ),  $K_d$ : Intraparticle diffusion rate constant ( $\text{mg/g/min}^{0.5}$ ) and  $C$ : Boundary layer thickness ( $\text{mg/g}$ ).

## References

1. El Essawy, N.A.; Ali, S.M.; Farag, H.A.; Konsowa, A.H.; Elnouby, M.; Hamad, H.A. Green Synthesis of Graphene from Recycled PET Bottle Wastes for Use in the Adsorption of Dyes in Aqueous Solution. *Ecotoxicol. Environ. Saf.* **2017**, *145*, 57–68, doi:10.1016/j.ecoenv.2017.07.014.
